# Supplementary material for: Experimental determination of solvation free energy of protons in non-protic ionic liquids using Raman spectroscopy
Source: Royal Society of Chemistry journal article supplement (doi:10.1039/d3cp04741e), 2024-01-01
Supplement: d3cp04741e1.pdf [file d3cp04741e1.pdf]

## **Supporting information**

### **Experimental determination of solvation free energy of protons in non-protic ionic liquids using Raman spectroscopy**

Aurelie Rensonnet<sup>a</sup> and Cedric Malherbe<sup>a\*</sup>

<sup>a</sup> University of Liege, Laboratory of Mass Spectrometry – Vibrational Spectroscopy, Allee du 6 aout 11  
(Bat B6B), 4020 Liege, Belgium.

## Table of contents

|                                                                                                                                          |    |
|------------------------------------------------------------------------------------------------------------------------------------------|----|
| 1. Synthesis of the ionic liquids .....                                                                                                  | 3  |
| 2. Preparation of acidic solutions of HNTf <sub>2</sub> in the synthesized [BMIm][NTf <sub>2</sub> ] .....                               | 4  |
| 3. Preparation of acidic solutions of concentrated 2,6-dichloro-4-nitroaniline (51.17 mM) in commercial [BMIm][NTf <sub>2</sub> ] .....  | 5  |
| 4. Preparation of acidic solutions of diluted 2,6-dichloro-4-nitroaniline (531.3 μM) in commercial [BMIm][NTf <sub>2</sub> ] .....       | 6  |
| 5. Hammett acidity function of acidic solutions of 2,6-dichloro-4-nitroaniline (74.22 mM) in synthesized [BMIm][NTf <sub>2</sub> ] ..... | 7  |
| 6. Hammett acidity function of acidic solutions of 2,6-dichloro-4-nitroaniline (79.17 mM) in synthesized [EMIm][NTf <sub>2</sub> ] ..... | 8  |
| 7. Hammett acidity function of acidic solutions of 2,6-dichloro-4-nitroaniline (65.87 mM) in synthesized [OMIm][NTf <sub>2</sub> ] ..... | 9  |
| 8. Processing of the Raman spectra .....                                                                                                 | 10 |
| 9. References .....                                                                                                                      | 11 |

## 1. Synthesis of the ionic liquids

First, the 1-alkyl-3-methylimidazolium bromide (either [EMIm]Br, [BMIm]Br or [OMIm]Br) was prepared by quaternization of 40 mL of freshly distilled MIm in 150 mL of AN by introducing, dropwise and at reflux under argon atmosphere, the corresponding alkyl bromide (1.05 equivalent of either bromoethane, 1-bromobutane or 1-bromooctane). The mixture was maintained at room temperature for 24h, then heated to 60°C for another 24h to ensure the completion of the reaction. The [EMIm]Br and the [BMIm]Br were obtained as solids by adding AE (antisolvent) at 60°C until the precipitation started, then the mixture was let to cool down to room temperature. The solids were filtered and washed with freshly-distilled cold AE under inert atmosphere then <sup>1</sup> by recrystallisation in a mixture of AE and AN. The purified solids were then dried under vacuum ( $10^{-2}$  mbar) at 50°C overnight. The precursors were obtained as white solids. [OMIm]Br was obtained as a viscous oil and was purified<sup>2</sup> by first evaporating the solvent, then washing the oil with fresh portions of AE (antisolvent, 6 x 100 mL). The [OMIm]Br was finally dried overnight under vacuum at 70°C to remove the traces of AE.

Second, the three ionic liquids were obtained by exchanging<sup>3</sup> the bromide with the bistriflimide anion. 1.1 equivalent of LiNTf<sub>2</sub> was added to ~15 g of the bromide imidazolium (either [EMIm]Br, [BMIm]Br or [OMIm]Br) and dissolved in 100 mL of DCM under inert atmosphere. The reaction mixture was stirred at room temperature for 48h. The suspension was then filtered to eliminate the LiBr (washed with three fractions of fresh DCM). The collected fractions of DCM containing the ionic liquid were washed with tridistilled water until no bromide was detected in the aqueous phase by precipitation with AgNO<sub>3</sub>. The DCM was then evaporated under vacuum to isolate the ionic liquids (either [EMIm][NTf<sub>2</sub>], [BMIm][NTf<sub>2</sub>] or [OMIm][NTf<sub>2</sub>]) that were further dried under vacuum at 60°C for 5 days.

## 2. Preparation of acidic solutions of HNTf<sub>2</sub> in the synthesized [BMIm][NTf<sub>2</sub>]

A series of acidic solutions of HNTf<sub>2</sub> in the synthesized [BMIm]NTf<sub>2</sub> were prepared by adding increasing amounts of HNTf<sub>2</sub> to a certain amount of the ionic liquid (Table S1).

**Table S1.** Preparation of acidic solutions of HNTf<sub>2</sub> in the synthesized [BMIm][NTf<sub>2</sub>]. These solutions were used for the determination of the solvation number of protons in this ionic liquid.  $m_{IL}$  is the mass of [BMIm][NTf<sub>2</sub>],  $m_{HNTf_2}$  and  $x_{HNTf_2}$  are respectively the mass and the molar fraction of HNTf<sub>2</sub>.

| Samples | $m_{IL}$ (mg) | $m_{HNTf_2}$ (mg) | $x_{HNTf_2}$ |
|---------|---------------|-------------------|--------------|
| S01     | 728.2         | 1149              | 0.703        |
| S02     | 726.7         | 721.2             | 0.603        |
| S03     | 724.5         | 470.3             | 0.495        |
| S04     | 724.3         | 389.3             | 0.448        |
| S05     | 723.1         | 348.8             | 0.418        |
| S06     | 722.3         | 285.9             | 0.373        |
| S07     | 720.4         | 242.9             | 0.333        |
| S08     | 717.2         | 195.2             | 0.287        |
| S09     | 717.0         | 167.3             | 0.259        |
| S10     | 716.1         | 142.8             | 0.226        |
| S11     | 715.3         | 122.1             | 0.202        |
| S12     | 714.0         | 99.5              | 0.171        |
| S13     | 707.3         | 48.8              | 0.091        |

### 3. Preparation of acidic solutions of concentrated 2,6-dichloro-4-nitroaniline (51.17 mM) in commercial [BMIm][NTf<sub>2</sub>]

A concentrated stock solution of pH-reporter (R) was obtained by dissolving 59.6 mg of 2,6-dichloro-4-nitroaniline in 8.0453 g of commercial [BMIm][NTf<sub>2</sub>] to obtain a solution with a concentration in pH-reporter  $[R]_{\text{Conc}} = 51.17$  mM. A series of acidic solutions, with increasing concentrations of strong acid were prepared from the concentrated stock solution to guarantee that the concentration of pH-reporter remains constant, by adding increasing amounts of HNTf<sub>2</sub> to a certain amount of stock solution (Table S2).

**Table S2.** Preparation of acidic solutions from the concentrated stock solution of 2,6-dichloro-4-nitroaniline in commercial [BMIm][NTf<sub>2</sub>]. These solutions were used for the determination of the Hammett acidity function by Raman spectroscopy.  $m_{\text{CR}}$  is the mass of the concentrated stock solution of 2,6-dichloro-4-nitroaniline (C and R stand for concentrated and reporter, respectively),  $m_{\text{HNTf}_2}$  and  $[\text{HNTf}_2]$  are respectively the mass and the concentration of HNTf<sub>2</sub> (a strong acid in that medium).

| Samples | $m_{\text{CR}}$ (mg) | $m_{\text{HNTf}_2}$ (mg) | $[\text{HNTf}_2]$ (mM) |
|---------|----------------------|--------------------------|------------------------|
| C01     | 565.2                | 23.6                     | 212.4                  |
| C02     | 566.6                | 13.1                     | 117.6                  |
| C03     | 605.0                | 9.9                      | 83.2                   |
| C04     | 588.5                | 4.7                      | 40.6                   |
| C05     | 515.8                | 3.8                      | 37.4                   |
| C06     | 479.6                | 2.1                      | 22.5                   |
| C07     | 637.1                | 1.7                      | 13.8                   |

#### 4. Preparation of acidic solutions of diluted 2,6-dichloro-4-nitroaniline (531.3 $\mu\text{M}$ ) in commercial [BMIm][NTf<sub>2</sub>]

A diluted stock solution of pH-reporter was obtained by diluting 605.7 mg of the concentrated stock solution with 5.4045 g of fresh commercial [BMIm][NTf<sub>2</sub>] to obtain a solution with a concentration in pH-reporter  $[\text{R}]_{\text{Dil}} = 531.3 \mu\text{M}$ . Again, a series of acidic solutions, with increasing concentrations of strong acid were prepared from that diluted stock solution of pH-reporter and an acidic stock solution containing 56.5 mM of HNTf<sub>2</sub> (Table S3).

**Table S3.** Preparation of acidic solutions from the diluted stock solution of 2,6-dichloro-4-nitroaniline in commercial [BMIm][NTf<sub>2</sub>]. These solutions were used for the determination of the Hammett acidity function by Raman spectroscopy.  $m_{\text{DR}}$  is the mass of the diluted stock solution of 2,6-dichloro-4-nitroaniline (D and R stand for diluted and reporter, respectively),  $m_{\text{HNTf}_2}$  and  $[\text{HNTf}_2]$  are respectively the mass and the concentration of HNTf<sub>2</sub> (a strong acid in that medium),  $m_{\text{D1}}$  is the mass of solution D1.

| Samples | $m_{\text{DR}}$ (mg) | $m_{\text{HNTf}_2}$ (mg) | $m_{\text{D1}}$ (mg) | $[\text{HNTf}_2]$ (mM) |
|---------|----------------------|--------------------------|----------------------|------------------------|
| D1      | 2475                 | 27.4                     | 0.0                  | 56.5                   |
| D2      | 333.2                | 0.0                      | 358.1                | 29.2                   |
| D3      | 369.5                | 0.0                      | 252.0                | 22.8                   |
| D4      | 542.8                | 0.0                      | 187.2                | 16.5                   |
| D5      | 461.7                | 0.0                      | 186.6                | 16.2                   |
| D6      | 587.3                | 0.0                      | 76.8                 | 6.5                    |

## 5. Hammett acidity function of acidic solutions of 2,6-dichloro-4-nitroaniline (74.22 mM) in synthesized [BMIm][NTf<sub>2</sub>]

A stock solution of pH-reporter was obtained by dissolving 56.0 mg of 2,6-dichloro-4-nitroaniline in 5.2117 g of synthesized [BMIm][NTf<sub>2</sub>] to obtain a solution with a concentration in pH-reporter of 74.22 mM. A series of acidic solutions, with increasing concentrations of strong acid, were prepared from that 74.22 mM stock solution of pH-reporter and an acidic stock solution containing 157.3 mM or 41.6 mM of HNTf<sub>2</sub> (Table S4).

**Table S4.** Preparation of acidic solutions from the 74.22 mM stock solution of 2,6-dichloro-4-nitroaniline in synthesized [BMIm][NTf<sub>2</sub>]. These solutions were used for the determination of the Hammett acidity function by Raman spectroscopy.  $m_{BR}$  is the mass of the 74.22 mM solution of 2,6-dichloro-4-nitroaniline (B and R stand for [BMIm][NTf<sub>2</sub>] and reporter, respectively),  $m_{HNTf_2}$  and  $[HNTf_2]$  are respectively the mass and the concentration of HNTf<sub>2</sub>,  $m_{B1}$  is the mass of solution B1, and  $m_{B5}$  is the mass of solution B5.

| Samples | $m_{HNTf_2}$ (mg) | $m_{BR}$ (mg) | $m_{B1}$ (mg) | $m_{B5}$ (mg) | $[HNTf_2]$ (mM) |
|---------|-------------------|---------------|---------------|---------------|-----------------|
| B1      | 49.2              | 1590.4        | 0.0           | 0.0           | 157.3           |
| B2      | 0.0               | 134.9         | 291.5         | 0.0           | 107.6           |
| B3      | 0.0               | 215.9         | 213.4         | 0.0           | 78.5            |
| B4      | 0.0               | 282.9         | 152.8         | 0.0           | 55.2            |
| B5      | 0.0               | 951.6         | 342.5         | 0.0           | 41.6            |
| B6      | 0.0               | 105.8         | 0.0           | 320.1         | 31.3            |
| B7      | 0.0               | 210.9         | 0.0           | 220.0         | 21.3            |
| B8      | 0.0               | 263.7         | 0.0           | 160.9         | 15.8            |
| B9      | 0.0               | 486.7         | 0.0           | 166.6         | 10.6            |

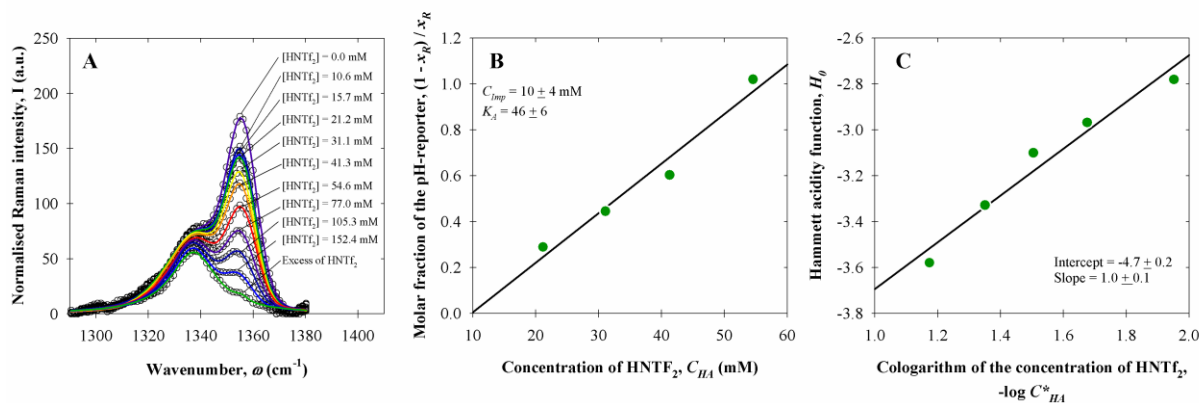

**Figure S1.** (A) Raman spectra obtained for the solutions containing 74.22 mM of the pH-reporter 2,6-dichloro-4-nitroaniline in the synthesized [BMIm][NTf<sub>2</sub>], with increasing amounts of HNTf<sub>2</sub>. Experimental data are shown as grey circles, Voigt-fitted data are shown as plain lines. (B) Evolution of the ratio of the molar fraction of the acidic ( $1 - x_R$ ) and basic ( $x_R$ ) forms of the 2,6-dichloro-4-nitroaniline calculated from the Raman spectra as a function of the added concentration of HNTf<sub>2</sub> ( $C_{HA}$ ). (C)  $H_0$  values calculated from Raman data as a function of the cologarithm of the concentration of HNTf<sub>2</sub>, corrected for the basic impurities ( $C^*_{HA}$ ).

## 6. Hammett acidity function of acidic solutions of 2,6-dichloro-4-nitroaniline (79.17 mM) in synthesized [EMIm][NTf<sub>2</sub>]

A stock solution of pH-reporter (R) was obtained by dissolving 59.3 mg of 2,6-dichloro-4-nitroaniline in 5.4992 g of synthesized [BMIm][NTf<sub>2</sub>] to obtain a solution with a concentration in pH-reporter of 79.17 mM. As previously, a series of acidic solutions, with increasing concentrations of strong acid, were prepared from that 79.17 mM stock solution of pH-reporter and an acidic stock solution containing 165.3 mM or 44.8 mM of HNTf<sub>2</sub> (Table S5).

**Table S5.** Preparation of acidic solutions from the 79.17 mM stock solution of 2,6-dichloro-4-nitroaniline in synthesized [EMIm][NTf<sub>2</sub>]. These solutions were used for the determination of the Hammett acidity function by Raman spectroscopy.  $m_{BR}$  is the mass of the 79.17 mM solution of 2,6-dichloro-4-nitroaniline (E and R stand for [EMIm][NTf<sub>2</sub>] and reporter, respectively),  $m_{HNTf_2}$  and  $[HNTf_2]$  are respectively the mass and the concentration of,  $m_{E1}$  is the mass of solution E1, and  $m_{E5}$  is the mass of solution E5.

| Samples | $m_{HNTf_2}$ (mg) | $m_{ER}$ (mg) | $m_{E1}$ (mg) | $m_{E5}$ (mg) | $[HNTf_2]$ (mM) |
|---------|-------------------|---------------|---------------|---------------|-----------------|
| E1      | 49.2              | 1608.7        | 0.0           | 0.0           | 165.3           |
| E2      | 0.0               | 154.9         | 307.1         | 0.0           | 109.9           |
| E3      | 0.0               | 224.5         | 223.4         | 0.0           | 82.5            |
| E4      | 0.0               | 310.4         | 155.1         | 0.0           | 55.1            |
| E5      | 0.0               | 1026.9        | 381.4         | 0.0           | 44.8            |
| E6      | 0.0               | 116.3         | 0.0           | 335.5         | 33.2            |
| E7      | 0.0               | 232.6         | 0.0           | 227.3         | 22.1            |
| E8      | 0.0               | 291.3         | 0.0           | 166.6         | 16.3            |
| E9      | 0.0               | 527.0         | 0.0           | 170.7         | 10.9            |

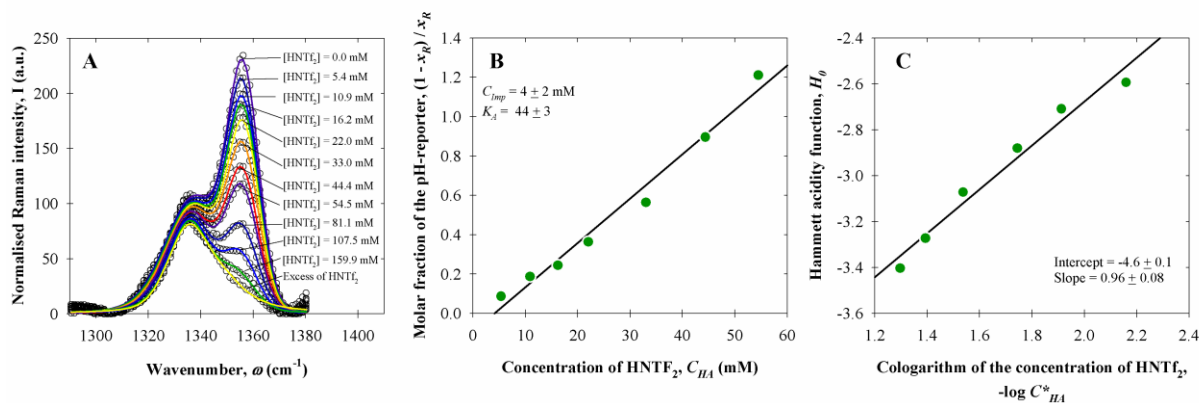

**Figure S2.** (A) Raman spectra obtained for the solutions containing 79.17 mM of the pH-reporter 2,6-dichloro-4-nitroaniline in the synthesized [EMIm][NTf<sub>2</sub>], with increasing amounts of HNTf<sub>2</sub>. Experimental data are shown as grey circles, Voigt-fitted data are shown as plain lines. (B) Evolution of the ratio of the molar fraction of the acidic ( $1 - x_R$ ) and basic ( $x_R$ ) forms of the 2,6-dichloro-4-nitroaniline calculated from the Raman spectra as a function of the added concentration of HNTf<sub>2</sub> ( $C_{HA}$ ). (C)  $H_0$  values calculated from Raman data as a function of the cologarithm of the concentration of HNTf<sub>2</sub>, corrected for the basic impurities ( $C_{HA}^*$ ).



## 7. Hammett acidity function of acidic solutions of 2,6-dichloro-4-nitroaniline (65.87 mM) in synthesized [OMIm][NTf<sub>2</sub>]

A stock solution of pH-reporter (R) was obtained by dissolving 51.7 mg of 2,6-dichloro-4-nitroaniline in 5.0048 g of synthesized [BMIm][NTf<sub>2</sub>] to obtain a solution with a concentration in pH-reporter of 65.87 mM. As previously, a series of acidic solutions, with increasing concentrations of strong acid, were prepared from that 65.87 mM stock solution of pH-reporter and an acidic stock solution containing 171.4 mM or 45.9 mM of HNTf<sub>2</sub> (Table S6).

**Table S6.** Preparation of acidic solutions from the 65.9 mM stock solution of 2,6-dichloro-4-nitroaniline in synthesized [OMIm][NTf<sub>2</sub>]. These solutions were used for the determination of the Hammett acidity function by Raman spectroscopy.  $m_{BR}$  is the mass of the 65.9 mM solution of 2,6-dichloro-4-nitroaniline (O and R stand for [OMIm][NTf<sub>2</sub>] and reporter, respectively),  $m_{HNTf_2}$  and  $[HNTf_2]$  are respectively the mass and the concentration of,  $m_{O1}$  is the mass of solution O1, and  $m_{O5}$  is the mass of solution O5.

| Samples | $m_{HNTf_2}$ (mg) | $m_{OR}$ (mg) | $m_{O1}$ (mg) | $m_{O5}$ (mg) | $[HNTf_2]$ (mM) |
|---------|-------------------|---------------|---------------|---------------|-----------------|
| O1      | 51.1              | 1399.3        | 0.0           | 0.0           | 171.4           |
| O2      | 0.0               | 129.0         | 260.6         | 0.0           | 114.7           |
| O3      | 0.0               | 198.1         | 190.0         | 0.0           | 83.9            |
| O4      | 0.0               | 265.3         | 127.5         | 0.0           | 55.6            |
| O5      | 0.0               | 875.1         | 319.7         | 0.0           | 45.9            |
| O6      | 0.0               | 89.8          | 0.0           | 276.6         | 34.6            |
| O7      | 0.0               | 178.6         | 0.0           | 179.9         | 23.0            |
| O8      | 0.0               | 231.3         | 0.0           | 132.9         | 16.7            |
| O9      | 0.0               | 446.3         | 0.0           | 157.4         | 12.0            |

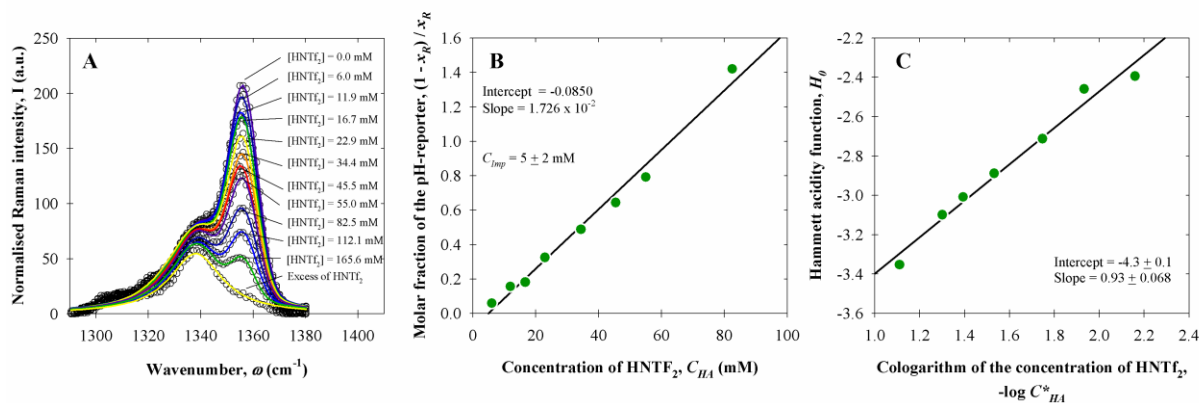

**Figure S3.** (A) Raman spectra obtained for the solutions containing 65.87 mM of the pH-reporter 2,6-dichloro-4-nitroaniline in the synthesized [OMIm][NTf<sub>2</sub>], with increasing amounts of HNTf<sub>2</sub>. Experimental data are shown as grey circles, Voigt-fitted data are shown as plain lines. (B) Evolution of the ratio of the molar fraction of the acidic ( $1 - x_R$ ) and basic ( $x_R$ ) forms of the 2,6-dichloro-4-nitroaniline calculated from the Raman spectra as a function of the added concentration of HNTf<sub>2</sub> ( $C_{HA}$ ). (C)  $H_0$  values calculated from Raman data as a function of the cologarithm of the concentration of HNTf<sub>2</sub>, corrected for the basic impurities ( $C_{HA}^*$ ).

## 8. Processing of the Raman spectra

The Raman spectra were treated as follows. The raw spectra (200-3600  $\text{cm}^{-1}$ , Figure S4A) were first extracted from 700 to 1600  $\text{cm}^{-1}$  (Figure S4B). Due to the fluorescence background, the spectra were thereafter baseline corrected with a Savitzky-Golay fourth-order polynomial on the entire Raman shift range (Figure S4C). For comparison purposes between the Raman spectra from different solutions, the spectra were finally normalized according to the intensity of the 1134  $\text{cm}^{-1}$  band (Figure S4D), attributed to the breathing mode of the imidazolium ring of the solvent (supposed to be constant in all spectra).

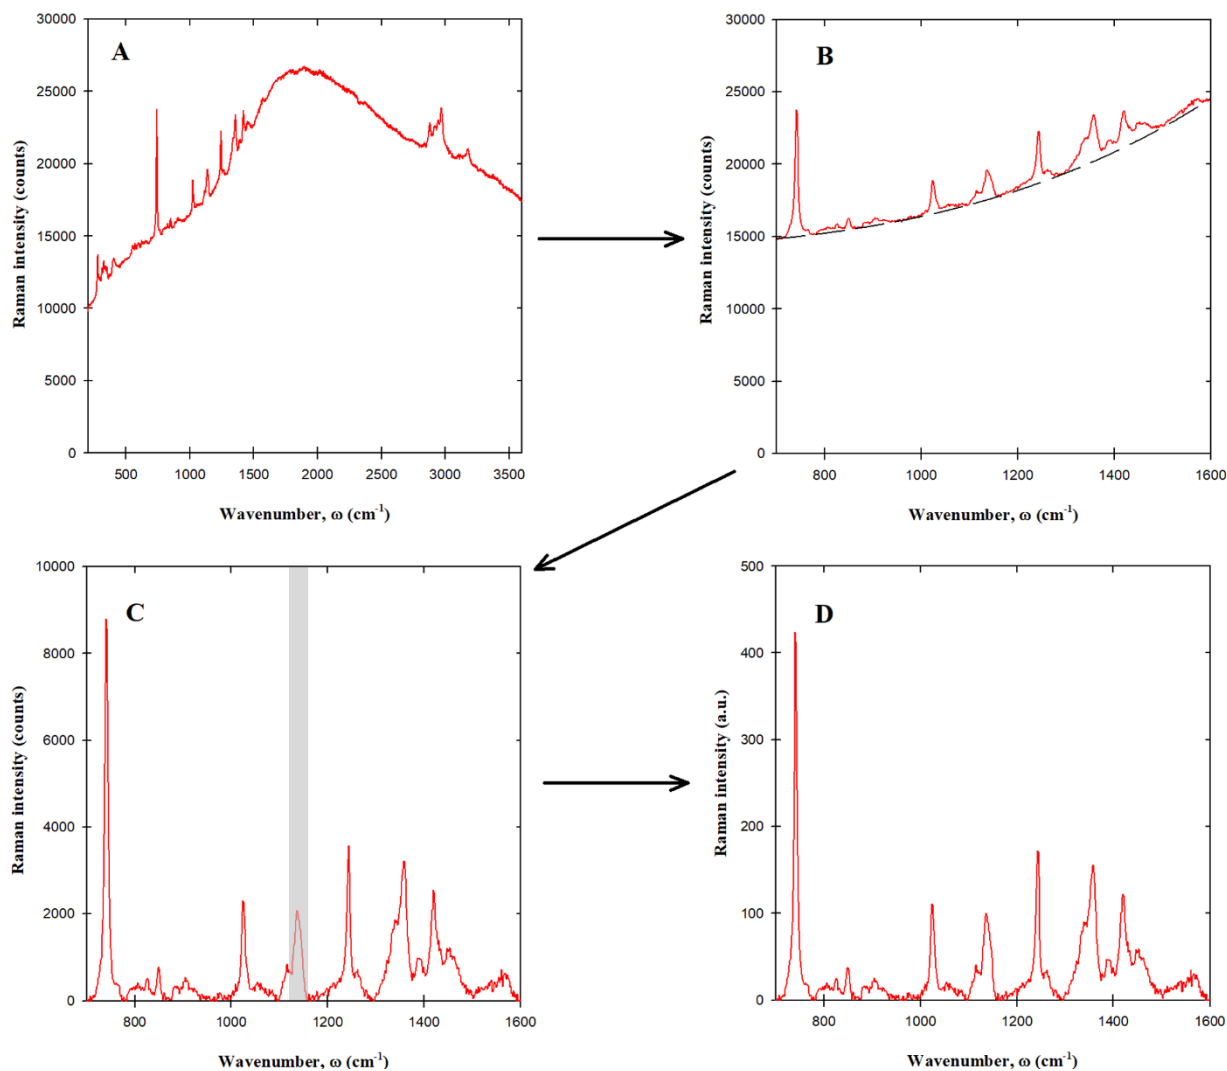

**Figure S4.** Data processing of the Raman spectra. (A) Raw spectrum obtained from the 22.5 mM solution in  $\text{HNTf}_2$  containing 51.17 mM of the pH-reporter 2,6-dichloro-4-nitroaniline in the commercial  $[\text{BMIm}][\text{NTf}_2]$ . (B) Spectrum extracted from 700-1600  $\text{cm}^{-1}$ . The fourth-order polynomial for the baseline correction is shown by the black dashed line. (C) Baseline corrected spectrum. The grey rectangle highlights the 1134  $\text{cm}^{-1}$  band used to normalize the spectrum. (D) Normalized spectrum.

## 9. References

- (1) Ziaee, M.; Jamehbozorg, B.; Sadeghi, R. Investigation on Aggregation Behavior of 1-Octyl-3-Methylimidazolium Bromide in Water and in CuO-Water Nanofluids by Measuring Electrical Conductivity and Surface Tension. *J. Iran. Chem. Soc.* **2022**, *19* (5), 2053–2065. <https://doi.org/10.1007/s13738-021-02436-0>.
- (2) Malherbe, C.; Robert, T.; Magna, L.; Olivier-Bourbigou, H.; Gilbert, B. Tentative Determination of the Acidity Level in Room Temperature Ionic Liquids by Electrochemical Methods. *ECS Trans.* **2009**, *16* (49), 3–16. <https://doi.org/10.1149/1.3159303>.
- (3) Robert, T.; Magna, L.; Olivier-Bourbigou, H.; Gilbert, B. A Comparison of the Acidity Levels in Room-Temperature Ionic Liquids. *J. Electrochem. Soc.* **2009**, *156* (9), F115. <https://doi.org/10.1149/1.3169857>.
